# Supplementary material
Source: PubMed Central journal article supplement (PMC4728739)
Supplement: NIHMS65707-supplement-FigureS1.pdf [file NIHMS65707-supplement-FigureS1.pdf]

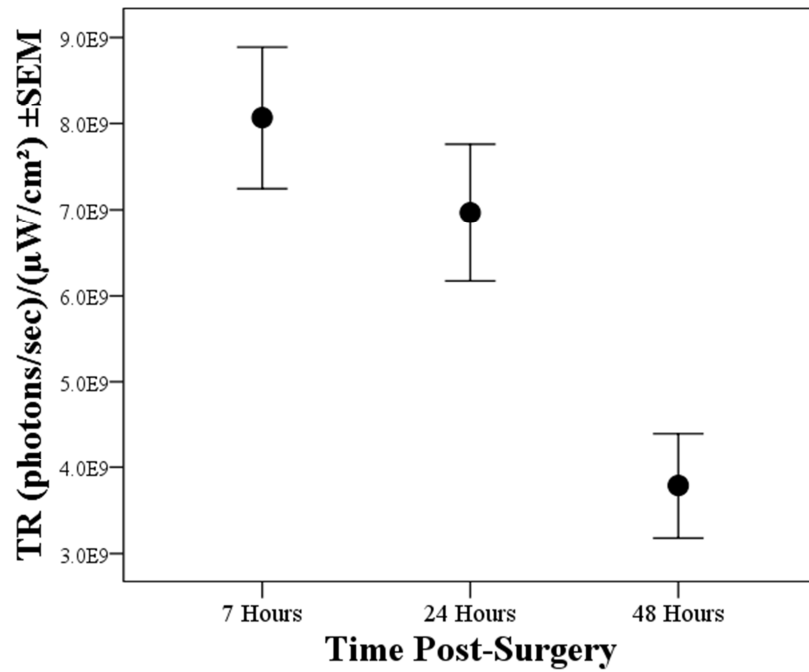

FigureS1. IVIS imaging results showing the mean Total Radiance (TR±1SEM) emitted by the COX-2 probe within 3 x 3cm ROI's placed over incision sites at 7, 24 and 48 hours following laparotomy (all pre-treatment groups).
